# Supplementary material
Source: Springer Nature journal article supplement (https://www.springermedizin.de/resource/supplementary/12885_2014_4731_MOESM7_ESM.pdf/9467088)

**A.**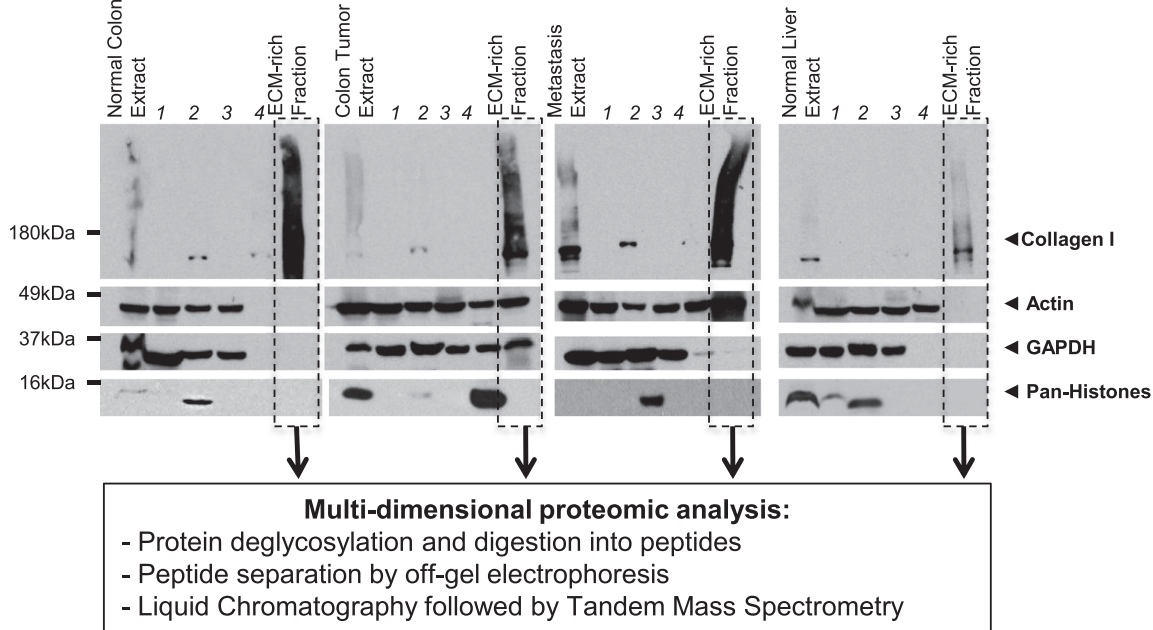**B.**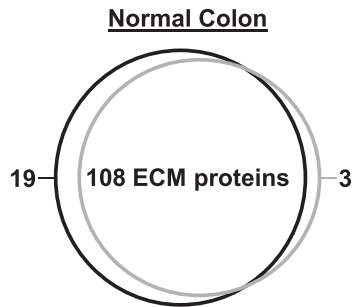**C.**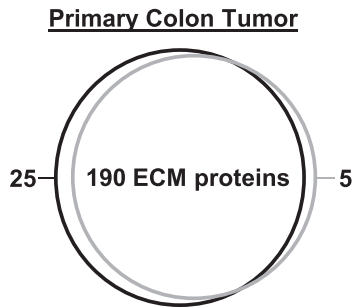**D.**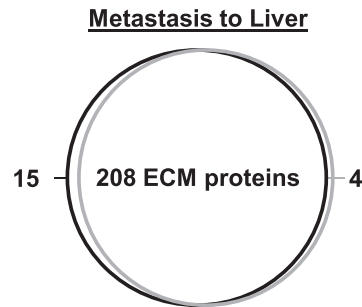

Supplement: MOESM7 [file 9467088]
